# Supplementary material for: Sequencing of isolated sperm cells for direct haplotyping of a human genome
Source: HighWire-hosted journal article supplement (doi:10.1101/gr.144600.112), 2013-01-02
Supplement: Supp_Table_S2.xlsx [file Supp_Table_S2.xlsx]

## Sheet: Breaks
		NCBI36						NCBI37
Sperm_ID	chr	Pre-X	Post-X	Segment containing X (kb)			chr	Pre-X
X01	1	82729245	82760426	31181			1	82956657	82987838																1:58887026
X01	2	79415518	79427023	11505			2	79562010	79573515																1:166674579
X01	2	157789122	157885735	96613			2	158080876	158177489																1:240091721
X01	2	240144301	240155150	10849			2	240479364	240490213																2:205511952
X01	3	107471295	107475555	4260			3	105988605	105992865																3:19628391
X01	3	186582046	186682249	100203			3	185099352	185199555																4:114045318
X01	4	138752777	138783464	30687			4	138533327	138564014																5:8464931
X01	6	410707	587667	176960			6	465707	642667																6:168699652
X01	6	39877433	39959657	82224			6	39769455	39851679																7:133939168
X01	6	102991281	103003636	12355			6	102884588	102896943																7:147385749
X01	7	13644772	13646456	1684			7	13678247	13679931																8:54004966
X01	7	115199586	115226589	27003			7	115412350	115439353																8:139324872
X01	7	156741164	156843995	102831			7	157048403	157151234																10:102734366
X01	8	81208155	81873392	665237			8	81045600	81710837																11:82089119
X01	8	139843591	139851720	8129			8	139774409	139782538																11:131409435
X01	11	130722905	130729658	6753			11	131217695	131224448																12:116859869
X01	12	65329294	65581505	252211			12	67043027	67295238																13:25501361
X01	15	60994393	61002704	8311			15	63207340	63215651																13:102865225
X01	15	96401042	96521532	120490			15	98583617	98704009																14:28100501
X01	16	77507502	77537061	29559			16	78950001	78979560																15:65239008
X01	18	22278529	22296873	18344			18	24024531	24042875																15:92006534
X01	19	59397453	59543139	145686			19	54705641	54851327																17:9962066
X01	20	667854	679744	11890			20	719854	731744																18:8831460
X01	22	16614535	16783629	169094			22	18234535	18403629																18:73932836
																									19:50654639
Y47	1	88070515	88342030	271515			1	88297927	88569442
Y47	1	184866147	185161025	294878			1	186599524	186894402
Y47	2	6753327	6973634	220307			2	6835876	7056183
Y47	2	204765913	204822328	56415			2	205057668	205114083
Y47	3	2790263	2842637	52374			3	2815263	2867637
Y47	3	102033340	102044129	10789			3	100550650	100561439
Y47	3	167885990	167986105	100115			3	166403296	166503411
Y47	3	182914265	183066011	151746			3	181426554	181583317
Y47	5	109399658	109409482	9824			5	109371759	109381583
Y47	6	138863401	138865241	1840			6	138821708	138823548
Y47	7	34243152	34260347	17195			7	34276627	34293822
Y47	7	117216535	117238360	21825			7	117429299	117451124
Y47	9	83464834	83471132	6298			9	84275014	84281312
Y47	10	2094415	2138432	44017			10	2104415	2148432
Y47	11	2266474	2449205	182731			11	2309898	2492629
Y47	12	3731982	3873395	141413			12	3861721	4003134
Y47	13	111715538	112358548	643010			13	112667537	113310547
Y47	15	23647475	23741062	93587			15	26096382	26189969
Y47	16	6181184	6288493	107309			16	6241183	6348492
Y47	16	75134230	75324932	190702			16	76576729	76767431
Y47	18	61586240	62404248	818008			18	63435260	64253268
Y47	20	9883686	10016488	132802			20	9935686	10068488
X45	1	78879555	79103113	223558			1	79106967	79330525
X45	1	174764308	174874049	109741			1	176497685	176607426
X45	1	233219380	233605643	386263			1	235152757	235539020
X45	2	212237751	212290147	52396			2	212529506	212581902
X45	3	1831166	1840505	9339			3	1856166	1865505
X45	3	71735578	71954704	219126			3	71652888	71872014
X45	5	30124802	30231147	106345			5	30089045	30195390
X45	5	154742056	154755008	12952			5	154761863	154774815
X45	6	163414285	163540606	126321			6	163494295	163620616
X45	7	42036777	42125988	89211			7	42070252	42159463
X45	8	124873850	125017091	143241			8	124804669	124947910
X45	9	7929672	7987399	57727			9	7939672	7997399
X45	11	44654914	45001247	346333			11	44698338	45044671
X45	12	4195237	4200238	5001			12	4324976	4329977
X45	13	36328041	36841033	512992			13	37430041	37943033
X45	15	40224723	40709948	485225			15	42437431	42922656
X45	18	64146863	64280995	134132			18	65995883	66130015
X06	1	20011023	20014507	3484			1	20138436	20141920
X06	1	173917022	173998912	81890			1	175650399	175732289
X06	1	238713161	238829906	116745			1	240646538	240763283
X06	2	1405353	1643661	238308			2	1426346	1664654
X06	2	146687885	146720671	32786			2	146971415	147004201
X06	2	241190313	241243919	53606			2	241541640	241595246
X06	3	11600202	11719584	119382			3	11625202	11744584
X06	4	18666528	18710473	43945			4	19057430	19101375
X06	4	125695332	125732971	37639			4	125475882	125513521
X06	4	184905950	185027295	121345			4	184668956	184790301
X06	5	92705784	92744704	38920			5	92680028	92718948
X06	6	6174347	6255535	81188			6	6229348	6310536
X06	7	7892085	7991836	99751			7	7925560	8025311
X06	7	105672084	105683086	11002			7	105884848	105896527
X06	8	20603379	20634599	31220			8	20559099	20590319
X06	8	62160654	62508746	348092			8	61998100	62346192
X06	8	139833578	139890241	56663			8	139764396	139821059
X06	9	125890734	125989034	98300			9	126850913	126949213
X06	12	4286346	4370972	84626			12	4416085	4500711
X06	12	62064221	62178862	114641			12	63777954	63892595
X06	12	129711608	129854397	142789			12	131145655	131288444
X06	13	30888598	30964605	76007			13	31990598	32066605
X06	15	56125943	56249106	123163			15	58338651	58461814
X06	15	95670263	95689852	19589			15	97869259	97888848
X06	16	76080412	76084928	4516			16	77522911	77527427
X06	17	4605720	4814939	209219			17	4658971	4874215
X06	18	6593954	6639965	46011			18	6603954	6649965
X06	18	74702598	74864830	162232			18	76601547	76763842
X06	21	40182130	40227194	45064			21	41260260	41305324
X06	22	25119849	25122236	2387			22	26789849	26792236
X22	1	192093570	192099650	6080			1	193826947	193833027
X22	1	227865497	227936292	70795			1	229798874	229869669
X22	2	8463006	8934485	471479			2	8545555	9017034
X22	2	37571685	37631256	59571			2	37718181	37777752
X22	2	162677908	162715666	37758			2	162969662	163007420
X22	3	28968697	29061498	92801			3	28993693	29086494
X22	3	126139385	126251056	111671			3	124656695	124768366
X22	4	25330587	25354186	23599			4	25721489	25745088
X22	4	139653526	139681890	28364			4	139434076	139462440
X22	4	187450021	187552805	102784			4	187213027	187315811
X22	7	30113824	30178313	64489			7	30147299	30211788
X22	8	136639684	136812726	173042			8	136570502	136743544
X22	10	6328761	6351755	22994			10	6288755	6311749
X22	10	77632360	77733897	101537			10	77962354	78063891
X22	11	30536061	30583236	47175			11	30579485	30626660
X22	12	83719434	84074263	354829			12	85195303	85550132
X22	12	128203301	128221462	18161			12	129637348	129655509
X22	13	94414612	94515499	100887			13	95616611	95717498
X22	14	20690535	20701491	10956			14	21620695	21631651
X22	15	36656080	37009906	353826			15	38868788	39222614
X22	15	94058707	94126647	67940			15	96257703	96325643
X22	17	787555	1070432	282877			17	840805	1123682
X22	17	74343728	74807369	463641			17	76832133	77295774
X22	19	5373553	5843486	469933			19	5422553	5892486
X22	21	15268752	15282928	14176			21	16346881	16361057
X34	1	15486065	15625985	139920			1	15613478	15753398
X34	1	160818110	160991260	173150			1	162551486	162724636
X34	1	246909937	246974301	64364			1	248843314	248907678
X34	3	56918013	57007730	89717			3	56942973	57032690
X34	3	123399015	123502884	103869			3	121916325	122020194
X34	3	195741621	195940453	198832			3	194260332	194459164
X34	4	3660989	4234832	573843			4	3691191	4183931
X34	4	172199835	172267747	67912			4	171963260	172031172
X34	5	171105430	171106956	1526			5	171172825	171174351
X34	6	104305245	104329505	24260			6	104198552	104222812
X34	6	148943212	148963518	20306			6	148901519	148921825
X34	7	84949465	85203133	253668			7	85111529	85365197
X34	7	155343115	155529323	186208			7	155650354	155836562
X34	8	139271718	139355257	83539			8	139202536	139286075
X34	10	4425485	4507381	81896			10	4435485	4517381
X34	11	72634968	73015577	380609			11	72957320	73337929
X34	11	132334045	132424595	90550			11	132828835	132919385
X34	12	116495371	116531558	36187			12	118010988	118047175
X34	14	60734982	61000431	265449			14	61665229	61930678
X34	15	22656162	22665960	9798			15	25105069	25114867
X34	15	46986684	46996924	10240			15	49199392	49209632
X34	16	85325973	85327328	1355			16	86768472	86769827
X34	17	54726214	54776448	50234			17	57371432	57421666
X34	18	35266706	35666226	399520			18	37012708	37412228
X34	19	54559725	54831880	272155			19	49867913	50140068
X34	21	41446611	41579057	132446			21	42524741	42657187
X34	22	24850564	24919752	69188			22	26520564	26589752
X37	1	85712693	85728360	15667			1	85940105	85955772
X37	2	115015401	115022902	7501			2	115298931	115306432
X37	3	189785545	189962237	176692			3	188302851	188479543
X37	5	90299672	90529870	230198			5	90263916	90494114
X37	6	46142450	46151520	9070			6	46034491	46043561
X37	7	142154515	142176424	21909			7	142474939	142509338
X37	7	154044339	154044943	604			7	154413406	154414010
X37	9	10742338	10827199	84861			9	10752338	10837199
X37	10	130933457	131140655	207198			10	131043467	131250665
X37	11	34617194	34636629	19435			11	34660618	34680053
X37	11	133835628	133847215	11587			11	134330418	134342005
X37	12	11579264	11600220	20956			12	11687997	11708953
X37	12	126231319	126292337	61018			12	127665366	127726384
X37	13	21680909	21725752	44843			13	22782909	22827752
X37	15	93274496	93475006	200510			15	95473492	95674002
X37	16	84512805	84567241	54436			16	85955304	86009740
X37	17	52851092	52967235	116143			17	55496093	55612236
X37	18	53846735	53850953	4218			18	55695737	55699955
X37	19	59865656	59868074	2418			19	55173844	55176262
X37	20	5581512	5791479	209967			20	5633512	5843479
X37	20	57676930	57910236	233306			20	58243535	58476841
X44	1	79256875	79314944	58069			1	79484287	79542356
X44	1	214302934	214767865	464931			1	216236311	216701242
X44	2	5405625	5415678	10053			2	5488174	5498227
X44	2	230530540	230537838	7298			2	230822296	230829594
X44	3	4378614	4461303	82689			3	4403614	4486303
X44	4	33999572	34142678	143106			4	34323177	34466283
X44	4	184816908	184827144	10236			4	184579914	184590150
X44	6	146985749	146986493	744			6	146944056	146944800
X44	9	93089700	93227962	138262			9	94049879	94188141
X44	9	134122751	134333660	210909			9	135132930	135343839
X44	10	116247513	116352825	105312			10	116257523	116362835
X44	11	87283808	87577169	293361			11	87606160	87937521
X44	12	1793301	1833020	39719			12	1923040	1962759
X44	14	80550575	80590013	39438			14	81480822	81520260
X44	16	13605476	13808838	203362			16	13697975	13901337
X44	16	85032400	85069416	37016			16	86474899	86511915
X44	17	65614599	65614942	343			17	68103004	68103347
X44	18	958021	1041047	83026			18	968021	1051047
X44	19	5373553	5542735	169182			19	5422553	5591735
X44	19	51053447	51164755	111308			19	46361607	46472915
X44	22	43036694	43137819	101125			22	44705361	44759155
X69	1	10736778	11436793	700015			1	10814191	11514206
X69	1	206231243	206469881	238638			1	208164620	208403258
X69	2	233637789	233771809	134020			2	233929545	234107070
X69	3	160197075	160539453	342378			3	158714381	159056759
X69	4	6286454	6492868	206414			4	6235553	6441967
X69	4	85028126	85273571	245445			4	84809102	85054547
X69	4	188917860	188967703	49843			4	188680866	188730709
X69	5	13452475	13803898	351423			5	13399475	13750898
X69	6	2544591	2547356	2765			6	2599592	2602357
X69	6	74076600	74303113	226513			6	74019879	74246392
X69	7	140744893	140871421	126528			7	141098424	141224952
X69	8	4054681	4083954	29273			8	4067273	4096546
X69	9	135558882	135648808	89926			9	136569061	136658987
X69	10	130640238	130730788	90550			10	130750248	130840798
X69	11	36820127	36841171	21044			11	36863551	36884595
X69	11	130710163	130729658	19495			11	131204953	131224448
X69	12	2722510	2739813	17303			12	2852249	2869552
X69	14	23034259	23069468	35209			14	23964419	24002887
X69	15	36748174	36821038	72864			15	38960882	39033746
X69	15	98508979	98546186	37207			15	100691456	100728663
X69	16	84882742	84906069	23327			16	86325241	86348568
X69	17	9086693	9277095	190402			17	9145968	9336370
X69	18	20975513	21026208	50695			18	22721515	22772210
X69	19	61498160	61507735	9575			19	56806348	56815923
X69	20	56597486	57551979	954493			20	57164080	58118584
X82	1	48331373	48806321	474948			1	48558786	49033734
X82	1	108418123	108448080	29957			1	108616600	108646557
X82	2	7867144	7885726	18582			2	7949693	7968275
X82	2	47557488	47668225	110737			2	47703984	47814721
X82	2	143439309	143446348	7039			2	143722839	143729878
X82	2	229009131	229340137	331006			2	229300887	229631893
X82	4	30676962	30928504	251542			4	31067347	31319406
X82	5	86130908	86641699	510791			5	86095152	86605943
X82	6	2405167	2553571	148404			6	2460168	2608995
X82	6	40625041	40709515	84474			6	40517063	40601537
X82	6	153817003	153997386	180383			6	153775310	153955693
X82	7	154143043	154230851	87808			7	154512110	154599918
X82	8	19370363	19436828	66465			8	19326083	19392548
X82	8	115935292	116231079	295787			8	115866116	116161903
X82	9	124431062	124646438	215376			9	125391241	125606617
X82	10	1735254	1737614	2360			10	1745254	1747614
X82	10	134145634	134159184	13550			10	134295644	134309194
X82	13	26301167	26443885	142718			13	27403167	27545885
X82	13	97720499	97750601	30102			13	98922498	98952600
X82	15	30087245	30090949	3704			15	32299953	32303657
X82	15	89888345	89891799	3454			15	92087341	92090795
X82	20	1834493	1865290	30797			20	1886493	1917290
X82	22	42845600	42859047	13447			22	44514267	44527714
X91	1	58640948	58887026	246078			1	58868360	59114438
X91	1	166578466	166674579	96113			1	168311842	168407955
X91	1	239773156	240091721	318565			1	241706533	242025098
X91	2	205066273	205511952	445679			2	205358028	205803707
X91	3	19543013	19628391	85378			3	19568009	19653387
X91	4	113959800	114045318	85518			4	113740351	113825869
X91	5	8232705	8464931	232226			5	8179705	8411931
X91	6	168637907	168699652	61745			6	168895058	168956803
X91	7	133876367	133939168	62801			7	134225827	134288628
X91	7	147384817	147385749	932			7	147753884	147754816
X91	8	53991756	54004966	13210			8	53829203	53843748
X91	8	139301553	139324872	23319			8	139232371	139255690
X91	10	102697516	102734366	36850			10	102707526	102744376
X91	11	82030055	82089119	59064			11	82352407	82411471
X91	11	131284767	131409435	124668			11	131779557	131904225
X91	12	116850065	116859869	9804			12	118365682	118375486
X91	13	25498933	25501361	2428			13	26600933	26603361
X91	13	102834312	102865225	30913			13	104036311	104067224
X91	14	27983716	28100501	116785			14	28913965	29030750
X91	15	65194953	65239008	44055			15	67407899	67451954
X91	15	91907512	92006534	99022			15	94106508	94205530
X91	17	9947495	9962066	14571			17	10006770	10021341
X91	18	8774612	8831460	56848			18	8784612	8841460
X91	18	73881424	73932836	51412			18	75780436	75831848
X91	19	50105416	50654639	549223			19	45413576	45962799
